# Supplementary material for: Determining Host Metabolic Limitations on Viral Replication via Integrated Modeling and Experimental Perturbation
Source: PubMed Central journal article supplement (PMC3475664; doi:10.1371/journal.pcbi.1002746), 2012-10-18
Supplement: pcbi.1002746.s007.pdf [file pcbi.1002746.s007.pdf]

**Table S1. FBA simulation media definitions.**

| FBA Metabolite | Tryptone | Glucose | Succinate | Acetate |
|----------------|----------|---------|-----------|---------|
| H2O            | 55 mM    | 55 mM*  | 55 mM*    | 55 mM*  |
| CO2            | 15 mM*   | 15 mM*  | 15 mM*    | 15 mM*  |
| PI             | 15 mM*   | 15 mM*  | 15 mM*    | 15 mM*  |
| H              | 10 mM*   | 10 mM*  | 10 mM*    | 10 mM*  |
| SLF            | 10 mM*   | 10 mM*  | 10 mM*    | 10 mM*  |
| O2             | 10 mM*   | 10 mM*  | 10 mM*    | 10 mM*  |
| NH3            | 10 mM    | 10 mM   | 10 mM     | 10 mM   |
| GLC            | -        | 10 mM   | -         | -       |
| SUCC           | -        | -       | 10 mM     | -       |
| AC             | -        | -       | -         | 10 mM   |
| ASP            | 5.7 mM   | -       | -         | -       |
| MET            | 1.6 mM   | -       | -         | -       |
| THR            | 3.7 mM   | -       | -         | -       |
| ILE            | 3.3 mM   | -       | -         | -       |
| SER            | 5.8 mM   | -       | -         | -       |
| LEU            | 6.3 mM   | -       | -         | -       |
| GLU            | 16.4 mM  | -       | -         | -       |
| TYR            | 1.6 mM   | -       | -         | -       |
| PRO            | 8.0 mM   | -       | -         | -       |
| PHE            | 2.7 mM   | -       | -         | -       |
| GLY            | 3.06 mM  | -       | -         | -       |
| HIS            | 1.6 mM   | -       | -         | -       |
| ALA            | 3.92 mM  | -       | -         | -       |
| LYS            | 4.9 mM   | -       | -         | -       |
| CYS            | 0.5 mM   | -       | -         | -       |
| ARG            | 1.9 mM   | -       | -         | -       |
| VAL            | 5.7 mM   | -       | -         | -       |
| TRP            | 0.5 mM   | -       | -         | -       |
| ASN            | 0.5 mM   | -       | -         | -       |

Asterisk (\*) indicates nutrients replenished to the given concentration at each time step.
