# Supplementary material for: Determining Host Metabolic Limitations on Viral Replication via Integrated Modeling and Experimental Perturbation
Source: PubMed Central journal article supplement (PMC3475664; doi:10.1371/journal.pcbi.1002746), 2012-10-18
Supplement: pcbi.1002746.s008.pdf [file pcbi.1002746.s008.pdf]

**Table S2. List of FBA Rules Relaxed for Rich Media Growth.**

| Rxn      | Original Rule |
|----------|---------------|
| BCAAUP1R | b0401         |
| BCAAUP2R | b0401         |
| BCAAUP3R | b0401         |
| ARGA     | b2818         |
| ARGB     | b3959         |
| ARGCR    | b3958         |
| ARGDR    | b3359         |
| ARGE1    | b3957         |
| ARGFR    | b0273         |
| ARGIR    | b4254         |
| ARGHR    | b3960         |
| SERC1    | b0907         |
| DAPB     | b0031         |
| LYSA     | b2838         |
| DEOB1R   | b4383         |
| DEOC     | b4381         |
| DEOD1R   | b4384         |
| DEOD2R   | b4384         |

Changes relative to rules in iMC1010v2 [1]. Rules relaxed indicates regulatory boolean expression altered to TRUE.

## References

1. Covert MW, Knight EM, Reed JL, Herrgard MJ, Palsson BO (2004) Integrating high-throughput and computational data elucidates bacterial networks. *Nature* 429: 92–96.
