# Supplementary material for: Determining Host Metabolic Limitations on Viral Replication via Integrated Modeling and Experimental Perturbation
Source: PubMed Central journal article supplement (PMC3475664; doi:10.1371/journal.pcbi.1002746), 2012-10-18
Supplement: pcbi.1002746.s009.pdf [file pcbi.1002746.s009.pdf]

**Table S3. Assumptions and References for construction of phage stoichiometry reactions.**

| Viral mRNA production reactions                                                                                                                                                                                                          |                     |
|------------------------------------------------------------------------------------------------------------------------------------------------------------------------------------------------------------------------------------------|---------------------|
| Nucleotide stoichiometry for all 60 T7 bacteriophage mRNAs from genome sequence and to date publications.                                                                                                                                | GenBank (NC 001604) |
| Each added NTP was assumed to produce one pyrophosphate during polymerization.                                                                                                                                                           | [1]                 |
| Viral Gene Product production reactions                                                                                                                                                                                                  |                     |
| Amino acid stoichiometry for all 60 T7 bacteriophage proteins.                                                                                                                                                                           | GenBank             |
| tRNA charging was assumed to hydrolyze 1 ATP to AMP and pyrophosphate                                                                                                                                                                    | [1]                 |
| Aminoacyl-tRNA binding was assumed hydrolyze 1 GTP to GDP                                                                                                                                                                                | [1]                 |
| tRNA translocation during translation was assumed to hydrolyze 1 GTP to GDP                                                                                                                                                              | [1]                 |
| Polymerization initiation was assumed to hydrolyze 1 GTP to GDP                                                                                                                                                                          | [1]                 |
| Host genome degradation and recycling reaction                                                                                                                                                                                           |                     |
| Nucleotide stoichiometry for T7 bacteriophage and E. coli genomes                                                                                                                                                                        | GenBank (U00096)    |
| During host genome degradation dNMPs were assumed to be produced in proportion to their content in the E. coli genome.                                                                                                                   | -                   |
| During viral genome production dNTPs were assumed to be used in proportion to their content in the T7 genome and converted into 1 viral dNTP.                                                                                            | -                   |
| T7 Genome synthesis reaction                                                                                                                                                                                                             |                     |
| Nucleotide stoichiometry for T7 bacteriophage genome                                                                                                                                                                                     | GenBank             |
| Each added dNTP was assumed to produce one pyrophosphate during polymerization                                                                                                                                                           | [1]                 |
| DNA helicase was assumed to hydrolyze 2 ATP to ADP per base pair of DNA unwound                                                                                                                                                          | [2]                 |
| Lagging strand synthesis: RNAmers primers 4 nucleotides long were assumed to hydrolyze 2 high energy phosphate bonds per polymerized NTP (8 high energy phosphate bonds total)                                                           | [1, 3]              |
| Lagging strand synthesis: Okazaki fragments were assumed to be 3,500 bases long on average                                                                                                                                               | [3]                 |
| Lagging strand synthesis: 2 high energy phosphate bonds were hydrolyzed to regenerate the NAD used in ligation                                                                                                                           | [1]                 |
| Proofreading: Error rate in T7 DNA polymerase was assumed to be 10 percent for dATP, 5 percent for dTTP, 1 percent for dGTP and dCTP. These were counted as additional A,T,G,C incorporated into the genome and then hydrolyzed to dNMPs | [1, 4]              |
| In all cases high energy phosphate bonds were accounted for as ATP being hydrolyzed to ADP.                                                                                                                                              | -                   |

Changes relative to rules in iMC1010v2 [5]. Rules relaxed indicates regulatory boolean expression altered to TRUE.

## References

1. Neidhardt FC, Ingraham JL, Schaechter M (1990) Physiology of the bacterial cell. a molecular approach. Sinauer Associates Inc.
2. Lee SJ, Richardson CC (2010) Molecular Basis for Recognition of Nucleoside Triphosphate by Gene 4 Helicase of Bacteriophage T7. *Journal of Biological Chemistry* 285: 31462–31471.
3. Engler MJ, Richardson CC (1983) Bacteriophage T7 DNA replication. Synthesis of lagging strands in a reconstituted system using purified proteins. *The Journal of biological chemistry* 258: 11197–11205.
4. Rappaport H (2004) The fidelity of replication of the three-base-pair set adenine/thymine, hypoxanthine/cytosine and 6-thiopurine/5-methyl-2-pyrimidinone with T7 DNA polymerase. *Biochemical Journal* 381: 709.
5. Covert MW, Knight EM, Reed JL, Herrgard MJ, Palsson BO (2004) Integrating high-throughput and computational data elucidates bacterial networks. *Nature* 429: 92–96.
